# Supplementary material for: Novel Limoisilactobacillus reuteri and Helianthus tuberoses synbiotic improved faecal biomarkers, antioxidant status and influenced the fecal microbial antibiotic sensitivity in neonatal dairy calves
Source: Research Square preprint supplement (doi:10.21203/rs.3.rs-7146873/v1), 2025-09-01
Supplement: Supplementary file 1 [file 87e04d0bc09ac44faa6ed762.docx]

**Table S1 Effect of antibiotic and synbiotic supplementation on temporal changes in faecal microbial attributes**

| **Period** | **CON** | **TET** | **SYN** | **Period mean** | **SEM** | **P value** |
| --- | --- | --- | --- | --- | --- | --- |
| **Coliforms** | | | | | | |
| Week 0 | 8.52mn | 8.83 m | 8.75 m | 8.70A | 0.168 | T=0.321  P<0.001  T*P<0.001 |
| Week 1 | 6.44* | 6.78opqr | 7.20nopq | 6.81BC |
| Week 2 | 6.11** | 6.80opqr | 7.16nopq | 6.69CD |
| Week 3 | 7.75mno | 7.77mno | 6.62* | 7.38B |
| Week 4 | 6.02** | 7.28nop | 5.96** | 6.42CDE |
| Week 6 | 6.16** | 5.45rs | 6.09** | 5.90E |
| Week 8 | 6.48* | 6.40* | 6.14** | 6.34CDE |
| Week 10 | 6.23** | 5.98** | 5.36s | 5.86E |
| Week 12 | 6.31** | 5.78rs | 6.10** | 6.07DE |
| Treatment mean | 6.67 | 6.79 | 6.60 |  |
| SEM | 0.607 | | | |  |  |
| ***Lactobacillus*** | | | | | | |
| Week 0 | 8.70mno | 9.21mn | 8.82mno | 8.91A | 0.072 | T<0.001  P<0.001  T*P=0.007 |
| Week 1 | 8.67mnop | 8.95mno | 9.25mn | 8.95A |
| Week 2 | 7.89opqrs | 8.24# | 9.54 m | 8.56AB |
| Week 3 | 8.24# | 9.17mn | 9.35mn | 8.92A |
| Week 4 | 7.73## | 8.28# | 8.40# | 8.14B |
| Week 6 | 7.72### | 8.20### | 8.17rstu | 8.03B |
| Week 8 | 7.40stu | 7.41qrstu | 6.97stu | 7.26C |
| Week 10 | 6.85stu | 7.22qrstu | 6.78stu | 6.95CD |
| Week 12 | 6.38 u | 6.52tu | 6.88stu | 6.59D |
| Treatment mean | 7.73Y | 8.13X | 8.24X |  |
| SEM | 0.028 | | | |  |  |
| ***Bifidobacteria*** | | | | | | |
| Week 0 | 9.60 | 10.26 | 9.70 | 9.85A | 0.033 | T<0.001  P<0.001  T*P=0.248 |
| Week 1 | 8.93 | 9.86 | 10.21 | 9.67A |
| Week 2 | 8.37 | 9.12 | 9.74 | 9.08A |
| Week 3 | 8.68 | 9.10 | 9.69 | 9.16A |
| Week 4 | 7.45 | 8.38 | 8.41 | 8.08B |
| Week 6 | 7.40 | 7.46 | 7.61 | 7.49BC |
| Week 8 | 7.57 | 7.55 | 7.53 | 7.55BC |
| Week 10 | 6.99 | 7.08 | 6.66 | 6.91C |
| Week 12 | 6.78 | 6.78 | 6.98 | 6.85C |
| Treatment mean | 7.97Y | 8.40X | 8.50X |  |
| SEM | 0.013 |  |  |  |  |  |

*indicates opqrs; ** indicates pqrs; # indicates nopqr; ## indicates opqrst; ### indicates pqrstu

Means bearing different superscripts ABCD (column),  XYZ (row), mnopqrrstu among row and Coolum differ significantly (P<0.05)

T -Treatment, P Period, T*P -Interaction

CON-No supplementation, TET-with tetracycline supplementation, SYN-with synbiotic supplementation.

SEM- Standard error mean

**Table S**2 **Effect of tetracycline or synbiotic supplementation on temporal changes in faecal biochemical attributes**

| **Period** | **CON** | **TET** | **SYN** | **Period mean** | **SEM** | **P value** |
| --- | --- | --- | --- | --- | --- | --- |
| ***pH*** | | | | | | |
| Week 0 | 6.00qr | 6.02pqr | 6.22** | 6.08C | 0.276 | T=0.040  P<0.001  T*P<0.001 |
| Week 1 | 6.78* | 6.68* | 6.66* | 6.71AB |
| Week 2 | 7.03mnop | 7.06mno | 6.93* | 7.01A |
| Week 3 | 6.51* | 7.51m | 6.91* | 6.98 A |
| Week 4 | 6.33** | 7.40m | 7.09mno | 6.94 A |
| Week 6 | 6.86* | 7.19mn | 6.56* | 6.87 AB |
| Week 8 | 7.02mnopq | 6.76* | 5.98r | 6.59 AB |
| Week 10 | 6.74* | 6.50* | 6.31** | 6.52ABC |
| Week 12 | 6.55* | 6.14opqr | 6.54* | 6.41BC |
| Treatment mean | 6.65Y | 6.81X | 6.58Z |  |
| SEM | 0.098 | | | |  |  |
| ***Ammonia (µmol/g faeces)*** | | | | | | |
| Week 0 | 16.65# | 10.40pq | 7.92q | 11.66D | 1.301 |  |
| Week 1 | 19.28# | 16.66# | 17.13# | 17.69CD |
| Week 2 | 19.13# | 17.37# | 16.76# | 17.75CD | T =0.018  P<0.001  T*P =0.001 |
| Week 3 | 19.43# | 24.38mnop | 18.18# | 20.66ABC |
| Week 4 | 21.14# | 36.25m | 25.14mno | 27.51A |
| Week 6 | 20.86# | 12.54opq | 9.57q | 14.32CD |
| Week 8 | 17.08# | 17.22# | 24.42mnop | 19.57BC |
| Week 10 | 29.64mn | 27.98mn | 18.39# | 25.33AB |
| Week 12 | 16.55# | 15.74# | 12.43opq | 14.91CD |
| Treatment mean | 19.97X | 19.84X | 16.66Y |  |
| SEM | 0.483 | | | |  |  |
| ***Lactic acid(µmol/g faeces)*** | | | | | | |
| Week 0 | 1.65 | 2.44 | 1.98 | 2.02 AB | 0.145 | T=0.040  P=0.002  T*P=0.360 |
| Week 1 | 1.16 | 1.60 | 1.78 | 1.51B |
| Week 2 | 1.43 | 1.26 | 1.46 | 1.38B |
| Week 3 | 1.99 | 1.92 | 2.49 | 2.13 AB |
| Week 4 | 1.60 | 2.03 | 2.00 | 1.87 AB |
| Week 6 | 1.45 | 1.51 | 1.90 | 1.62 AB |
| Week 8 | 1.30 | 1.87 | 2.33 | 1.83 AB |
| Week 10 | 1.37 | 1.57 | 1.90 | 1.61AB |
| Week 12 | 2.51 | 2.85 | 2.75 | 2.37A |
| Treatment mean | 1.61Y | 1.89XY | 2.05X |  |
| SEM | 0.041 | | | |  |  |

**Table S3 Temporal changes in faecal SCFAs in tetracycline or synbiotic supplemented calves**

| **Period** | **CON** | **TET** | **SYN** | **Period mean** | **SEM** | **P value** |
| --- | --- | --- | --- | --- | --- | --- |
| ***Acetate (µmol/g faeces)*** | | | | | | |
| Week 0 | 35.4 | 42.8 | 54.5 | 44.2AB | 6.831 | T=0.029  P<0.001  T*P=0.705 |
| Week 1 | 28.6 | 39.5 | 36.3 | 34.8ABC |
| Week 2 | 45.6 | 38.1 | 38.9 | 40.9AB |
| Week 3 | 38.7 | 53.1 | 62.9 | 51.6A |
| Week 4 | 28.6 | 29.3 | 33.4 | 30.5BC |
| Week 6 | 42.1 | 36.2 | 48.8 | 42.3AB |
| Week 8 | 40.3 | 53.5 | 79.0 | 57.6 A |
| Week 10 | 30.3 | 26.9 | 29.3 | 28.8C |
| Week 12 | 31.0 | 39.6 | 30.6 | 33.4BC |
| Treatment mean | 35.6Y | 39.9Y | 44.8X |  |
| SEM | 3.22 | | | |  |  |
| ***Propionate (µmol/g faeces)*** | | | | | | |
| Week 0 | 16.3 | 13.4 | 21.0 | 16.9ABC | 3.103 | T =0.004  P<0.001  T*P =0.547 |
| Week 1 | 16.1 | 25.4 | 21.0 | 20.9A |
| Week 2 | 21.6 | 18.7 | 16.6 | 19.0AB |
| Week 3 | 18.5 | 20.7 | 28.0 | 22.4A |
| Week 4 | 13.1 | 14.5 | 13.7 | 13.8BC |
| Week 6 | 20.1 | 13.9 | 18.9 | 17.6AB |
| Week 8 | 13.5 | 12.1 | 24.8 | 16.8 ABC |
| Week 10 | 11.8 | 9.8 | 13.2 | 11.6C |
| Week 12 | 10.8 | 15.1 | 14.5 | 13.5C |
| Treatment mean | 15.8Y | 16.0Y | 18.1X |  |
| SEM | 1.11 | | | |  |  |
| ***Butyrate (µmol/g feces)*** | | | | | | |
| Week 0 | 7.64 | 5.03 | 11.86 | 8.17A | 0. 21 | T=0.025  P=0.002  T*P=0.897 |
| Week 1 | 3.92 | 7.94 | 6.23 | 6.03A |
| Week 2 | 5.13 | 4.62 | 3.52 | 4.42AB |
| Week 3 | 5.63 | 7.54 | 5.93 | 6.47A |
| Week 4 | 4.52 | 2.31 | 4.02 | 3.62B |
| Week 6 | 6.03 | 1.31 | 4.22 | 3.85AB |
| Week 8 | 4.92 | 6.93 | 9.05 | 6.97A |
| Week 10 | 2.71 | 2.11 | 3.82 | 2.89B |
| Week 12 | 3.32 | 4.92 | 6.73 | 4.91AB |
| Treatment mean | 4.94Y | 4.91Y | 6.23X |  |
| SEM | 0.603 | | | |  |  |
| ***TVFA (µmol/g faeces)*** | | | | | | |
| Week 0 | 59.50 | 61.61 | 87.64 | 69.28AB | 1.054 | T=0.041  P<0.001  T*P=0.623 |
| Week 1 | 48.84 | 73.26 | 63.82 | 61.87AB |
| Week 2 | 72.76 | 61.71 | 59.19 | 64.2AB |
| Week 3 | 63.11 | 81.71 | 97.38 | 80.3A |
| Week 4 | 46.43 | 46.43 | 50.05 | 47.9BC |
| Week 6 | 69.65 | 53.06 | 73.06 | 64.9AB |
| Week 8 | 58.99 | 72.86 | 113.36 | 81.3A |
| Week 10 | 45.12 | 38.99 | 46.53 | 46.6C |
| Week 12 | 45.23 | 59.90 | 43.01 | 49.2BC |
| Treatment mean | 56.3Y | 60.7XY | 70.2X |  |
| SEM | 3.589 | | | |  |  |
| ***Acetate : Propionate*** | | | | | | |
| Week 0 | 2.17 | 3.20 | 2.60 | 2.66A | 0.423 | T=0.996  P<0.001  T*P=0.891 |
| Week 1 | 1.77 | 1.56 | 1.73 | 1.64B |
| Week 2 | 2.11 | 2.04 | 2.35 | 2.16B |
| Week 3 | 2.09 | 2.56 | 2.24 | 2.30AB |
| Week 4 | 2.18 | 2.02 | 2.43 | 2.21AB |
| Week 6 | 2.09 | 2.60 | 2.58 | 2.42AB |
| Week 8 | 3.00 | 4.43 | 3.19 | 3.54A |
| Week 10 | 2.57 | 2.76 | 2.21 | 2.51AB |
| Week 12 | 2.87 | 2.62 | 2.11 | 2.53AB |
| Treatment mean | 2.32 | 2.64 | 2.38 |  |
| SEM | 0.219 | | | |  |  |

ABC Means bearing different superscripts in a column XYZ in a row differ significantly (P<0.05)

T -Treatment, P Period, T*P -Interaction

CON-No supplementation, TET-with tetracycline supplementation, SYN-with synbiotic supplementation.

SEM- Standard error mean

**Table S4 Effect of tetracycline or synbiotic supplementation on serum biochemical indices of calves**

| **Period** | **CON** | **TET** | **SYN** | **Period mean** | | **SEM** | | **P value** |
| --- | --- | --- | --- | --- | --- | --- | --- | --- |
| ***Total protein(g/dL)*** | | | | | | | | |
| Week 0 | 9.70 | 8.17 | 7.93 | | 8.60A | 0.423 | | T=0.867  P=0.014  T*P =0.251 |
| Week 6 | 6.30 | 7.66 | 6.57 | | 6.84B |
| Week 12 | 6.91 | 6.94 | 7.62 | | 7.16AB |
| Treatment mean | 7.64 | 7.59 | 7.37 | |  |
| ***Albumin (g/dL)*** | | | | | | | | |
| Week 0 | 2.80 | 2.63 | 2.78 | | 2.74 | 0.192 | | T=0.257  P=0.079  T*P =0.505 |
| Week 6 | 2.97 | 3.38 | 2.48 | | 2.94 |
| Week 12 | 3.71 | 3.37 | 2.96 | | 3.34 |
| Treatment mean | 3.16 | 3.13 | 2.74 | |  |
| ***Globulin (g/dL)*** | | | | | | | | |
| Week 0 | 6.90 | 5.53 | 5.15 | | 5.86A | 0.065 | | T=0.959  P<0.001  T*P= 0.109 |
| Week 6 | 3.34 | 4.27 | 4.08 | | 3.90B |
| Week 12 | 3.21 | 3.82 | 4.65 | | 3.89B |
| Treatment mean | 4.48 | 4.54 | 4.63 | |  |
| ***A:G ratio*** | | | | | | | | |
| Week 0 | 0.44 | 0.54 | 0.55 | | 0.51B | 0.090 | | T=0.067  P=0.001  T*P =.141 |
| Week 6 | 0.97 | 0.95 | 0.65 | | 0.86B |
| Week 12 | 1.39 | 0.98 | 0.70 | | 1.02A |
| Treatment mean | 0.93 | 0.83 | 0.63 | |  |
| **Kidney function indices** | | | | | | | | |
| ***Urea (mg/dL)*** | | | | | | | | |
| Week 0 | 52.75 | 32.57 | 29.38 | | 38.23A | | 3.546 | T=0.182  P=0.047  T*P =0.090 |
| Week 6 | 31.86 | 39.18 | 29.03 | | 33.35AB | |
| Week 12 | 21.73 | 33.27 | 22.79 | | 25.93B | |
| Treatment mean | 35.44 | 35.01 | 27.07 | |  | |
| ***Creatinine (mg/dL)*** | | | | | | | | |
| Week 0 | 2.51 | 2.97 | 2.90 | | 2.79 A | 0.261 | | T=0.745  P<0.001  T*P =0.659 |
| Week 6 | 1.83 | 0.97 | 1.40 | | 1.40 B |
| Week 12 | 1.34 | 0.90 | 0.92 | | 1.05 B |
| Treatment mean | 1.89 | 1.61 | 1.74 | |  |
| ***Blood urea nitrogen (mg/dL)*** | | | | | | | | |
| Week 0 | 24.65 | 15.22 | 13.73 | | 17.87A | 4.443 | | T=0.443  P=0.055  T*P =0.340 |
| Week 6 | 14.89 | 18.31 | 13.56 | | 15.59AB |
| Week 12 | 10.16 | 15.55 | 10.65 | | 12.12B |
| Treatment mean | 16.56 | 16.36 | 12.65 | |  |
| ***Lipid profile*** | | | | | | | | |
| ***Total cholesterol (mg/dL)*** | | | | | | | | |
| Week 0 | 82.41 | 59.71 | 56.3 | | 66.14 | 4.844 | | T=0.034  P=0.090  T*P =0.515 |
| Week 6 | 62.75 | 82.36 | 57.5 | | 67.53 |
| Week 12 | 80.04 | 74.52 | 65.97 | | 73.51 |
| Treatment mean | 75.06X | 72.19 XY | 59.92 Y | |  |
| ***Triglycerides(mg/dL)*** | | | | | | | | |
| Week 0 | 54.58 | 79.77 | 74.00 | | 69.45 A | 5.828 | | T=0.151  P=0.001  T*P =0.074 |
| Week 6 | 38.73 | 63.62 | 41.22 | | 47.86 B |
| Week 12 | 29.42 | 27.67 | 24.07 | | 27.05 C |
| Treatment mean | 40.91 | 57.02 | 46.43 | |  |
| ***HDL cholesterol (mg/dL)*** | | | | | | | | |
| Week 0 | 24.38 | 24.73 | 24.56 | | 24.56 A | 0.749 | | T=0.807  P<0.001  T*P= 0.515 |
| Week 6 | 25.14 | 24.91 | 24.41 | | 24.82 A |
| Week 12 | 25.03 | 17.47 | 18.72 | | 20.41B |
| Treatment mean | 24.85 | 22.37 | 22.56 | |  |
| ***LDL Cholesterol (mg/dL)*** | | | | | | | | |
| Week 0 | 47.10 | 19.02 | 16.93 | | 27.68 | 5.09 | | T=0.040  P=0.601  T*P =0.108 |
| Week 6 | 29.86 | 46.45 | 24.34 | | 33.55 |
| Week 12 | 49.13 | 51.52 | 42.44 | | 47.69 |
| Treatment mean | 42.03 X | 38.42 XY | 28.07Y | |  |
| ***VLDL cholesterol (mg/dL)*** | | | | | | | | |
| Week 0 | 10.91 | 15.95 | 14.80 | | 13.89A | 1.17 | | T=0.151  P<0.001  T*P =0.515 |
| Week 6 | 7.75 | 12.72 | 8.24 | | 9.57 B |
| Week 12 | 5.88 | 5.53 | 4.81 | | 5.41 C |
| Treatment mean | 8.18 | 11.40 | 9.28 | |  |
| ***Triglycerides :Total Cholesterol*** | | | | | | | | |
| Week 0 | 0.662 | 1.336 | 1.314 | | 1.104A | 0.115 | | T=0.044  P=0.002  T*P =0.487 |
| Week 6 | 0.617 | 0.772 | 0.717 | | 0.702B |
| Week 12 | 0.368 | 0.371 | 0.365 | | 0.368C |
| Treatment mean | 0.549Y | 0.827X | 0.799X | |  |
| ***HDL:LDL*** | | | | | | | | |
| Week 0 | 0.517 | 1.300 | 1.450 | | 1.089A | 0.122 | | T=0.012  P=0.034  T*P =0.353 |
| Week 6 | 0.842 | 0.557 | 0.982 | | 0.794B |
| Week 12 | 0.510 | 0.339 | 0.441 | | 0.430C |
| Treatment mean | 0.623Z | 0.732Y | 0.958X | |  |
| ***Calcium*** | | | | | | | | |
| Week 0 | 9.70 | 10.62 | 9.34 | | 9.89A | 0.114 | | T=0.215  P<0.001  T*P =0.280 |
| Week 6 | 6.54 | 7.08 | 6.47 | | 6.69B |
| Week 12 | 8.66 | 8.52 | 10.9 | | 9.36A |
| Treatment mean | 8.30 | 8.74 | 8.90 | |  |
| ***Phosphorus*** | | | | | | | | |
| Week 0 | 8.92 | 8.84 | 8.13 | | 8.630A | 0.154 | | T=0.332  P<0.001  T*P =0.358 |
| Week 6 | 7.51 | 7.77 | 7.65 | | 7.643B |
| Week 12 | 8.05 | 7.71 | 7.78 | | 7.847B |
| Treatment mean | 8.16 | 8.11 | 7.85 | |  |
| ***Calcium: Phosphorus*** | | | | | | | | |
| Week 0 | 1.09 | 1.20 | 1.15 | | 1.15A | 0.036 | | T=0.047  P=0.036  T*P =0.801 |
| Week 6 | 0.87 | 0.91 | 0.85 | | 0.88B |
| Week 12 | 1.08 | 1.11 | 1.40 | | 1.19A |
| Treatment mean | 1.01X | 1.07XY | 1.13Y | |  |

Means bearing different superscripts ABCD (column)  XYZ (row) differ significantly

T -Treatment, P Period, T*P -Interaction

CON-No supplementation, TET-with tetracycline supplementation, SYN-with synbiotic supplementation.

SEM- Standard error mean

**Table S5 Effect of tetracycline or synbiotic supplementation on serum antioxidant status of calves**

| **Period** | **CON** | **TET** | **SYN** | **Period mean** | **SEM** | **P value** |
| --- | --- | --- | --- | --- | --- | --- |
| ***Malondialdehyde ng/dL*** | | | | | | |
| Week 0 | 10.9 | 8.24 | 7.50 | 8.89 | 0.249 | T=0.021  P=0.059  T*P =0.342 |
| Week 6 | 10.1 | 7.90 | 10.3 | 9.44 |
| Week 12 | 6.70 | 6.24 | 8.22 | 7.05 |
| Treatment mean | 9.24X | 7.46Y | 8.68XY |  |
| ***Reduced Superoxide dismutase (SOD) ng/dL*** | | | | | | |
| Week 0 | 6.28mn | 4.25n | 4.94n | 5.15B | 0.999 | T=0.726  P<0.001  T*P =0.008 |
| Week 6 | 8.65mn | 9.64m | 5.97mn | 8.09A |
| Week 12 | 7.55mn | 6.68mn | 10.2m | 8.15A |
| Treatment mean | 7.49 | 6.86 | 7.04 |  |
| ***Reduced Glutathione(GPx) ng/dL*** | | | | | | |
| Week 0 | 9.94mno | 9.80mno | 8.19no | 9.31B | 1.940 | T=0.447  P=0.001  T*P= 0.006 |
| Week 6 | 16.4mn | 17.6m | 12.5mno | 15.49A |
| Week 12 | 12.7mno | 5.45o | 15.7mn | 11.57B |
| Treatment mean | 13.0 | 11.2 | 12.1 |  |
| ***Catalase (IU/dL)*** | | | | | | |
| Week 0 | 3.97 | 5.96 | 5.79 | 5.24 | 0.678 | T=0.014  P=0.056  T*P =.969 |
| Week 6 | 2.68 | 4.49 | 2.93 | 3.37 |
| Week 12 | 2.02 | 3.88 | 3.20 | 3.03 |
| **Treatment mean** | 2.89Z | 4.77X | 3.97Y |  |
